# Supplementary material for: Cryo-EM structure of DNA-bound Smc5/6 reveals DNA clamping enabled by multi-subunit conformational changes
Source: PubMed Central journal article supplement (PMC9191643; doi:10.1073/pnas.2202799119), 2022-06-01
Supplement: pnas.2202799119.sapp.pdf [file pnas.2202799119.sapp.pdf]

## Supplementary Material for

### Cryo-EM structure of DNA-bound Smc5/6 reveals DNA clamping enabled by multi-subunit conformational changes

You Yu<sup>1#</sup>, Shibai Li<sup>2#</sup>, Zheng Ser<sup>3</sup>,  
Huihui Kuang<sup>4</sup>, Thane Than<sup>2</sup>, Danying Guan<sup>2</sup>,  
Xiaolan Zhao<sup>2\*</sup> and Dinshaw J. Patel<sup>1\*</sup>

<sup>1</sup> Structural Biology Program, Memorial Sloan-Kettering Cancer Center, New York, NY, 10065, USA

<sup>2</sup> Molecular Biology Program, Memorial Sloan-Kettering Cancer Center, New York, NY, 10065, USA

<sup>3</sup> Functional Proteomics Laboratory, Institute of Molecular and Cell Biology, Agency for Science, Technology and Research (A\*STAR), Singapore 138673, Singapore

<sup>4</sup> Simons Electron Microscopy Center, New York Structural Biology Center, New York, NY, 10027, USA

# co-first authors

\* Corresponding authors: [zhaox1@mskcc.org](mailto:zhaox1@mskcc.org) (X.Z.) and [pateld@mskcc.org](mailto:pateld@mskcc.org) (D.J.P.)

## Supplementary Figure Legends

**Fig. S1. Sample preparation of 6-subunit *S. cerevisiae* Smc5/6-E/Q complex.** Sizing column (Superose 6 increase) elution profile and Coomassie stained gel picture showing the Smc5/6 subunits in the peak fraction and the EM samples containing the complex, dsDNA, and ATP.

**Fig. S2. Cryo-EM reconstruction of DNA-bound Smc5/6 complex.** (A) Workflow of cryo-EM image processing for the complex. (B) Global Fourier Shell Correlation (FSC) curve of the complex. The curve for the two half datasets is in blue and that for the refined model versus the cryo-EM map is in red. The overall cryo-EM map resolution is 3.8 Å with FSC set at 0.143. (C) Angular distribution plot of final 3D EM map for the complex. (D) Final 3D reconstructed map of the complex colored according to local resolution.

**Fig. S3. Side chain identification in the cryo-EM structure of DNA-bound Smc5/6 and structural details.** (A) A view of the complex in ribbon representation with density map shown as a transparent surface. Inserts outline examples where amino acid side chains can be fitted in the density map. (B, C) An electron density representation (B) and a ribbon representation (C) of the DNA-bound Smc5/6 structure. These views are rotated 180° compared with those in Figure 1B and 1C. (D) “Engaged” Smc1 and Smc3 head domains in the structure of cohesion in the ATP- and DNA-bound Smc1/3-E/Q complex (PDB: 6zz6)<sup>1</sup>. (E) “Juxtaposed” Smc2 and Smc4 head domains in the structure of apo-condensin (PDB: 6YVU)<sup>2</sup>.

**Fig. S4. Sequence alignment and comparison of Nse3 proteins from *X. laevis* and *S. cerevisiae*.** (A) Sequence alignments between the Nse3 domains of *S. cerevisiae* and *X. laevis*. Residues involved in hydrogen bond interactions with DNA are marked by stars for the Nse3-patch 1 region (blue) and the Nse3-mediated patch 2 region (green). The linker between the WHA and WHB of Nse3 in yeast contains insertions including a helix (adH) and a loop (WHL). (B) Structural overlay between the Nse1-3 and the interacting Nse4 peptide from *X. laevis* (grey) and *S. cerevisiae* (color).

**Fig. S5. DNA binding details of the DNA-bound Smc5/6 complex.** (A, B) Overview of DNA contacts involving Nse3 (patches 1 and 2) and Nse4 (patch 5) (A) and those involving Smc5 (patch 3) and Smc6 (patch 4) (B). Observable Lys and Arg side chains are shown in a ribbon representation, while those whose side chain densities could not be traced are shown in a ball representation.

**Fig. S6. CLMS data from DNA-free Smc5/6 mapped to the DNA-bound Smc5/6 structure.** Inter-subunit CLs detected among Nse1, Nse3 and Nse4. Red lines indicate CL pairs with C $\alpha$ -C $\alpha$  distance exceeding that allowed by crosslinkers, while black lines indicate satisfied CL pairs.

**Fig. S7. SMC-DNA clamping in the E-K compartment.** The protein subunits are shown in a ribbon representation and the bound dsDNA in a yellow stick representation. (A) 3.8 Å cryo-EM structure of dsDNA-bound *S. cerevisiae* Smc5/6-EQ complex (this study). (B) 3.4 Å cryo-EM

structure of dsDNA-bound *S. cerevisiae* cohesion-EQ complex (PDB: 6ZZ6)<sup>1</sup>. (C) 3.1 Å cryo-EM structure of dsDNA-bound *E. coli* MukBEF-EQ complex (PDB: 7NYW)<sup>3</sup>.

## References

1. Collier, J. et al. Transport of DNA within cohesin involves clamping on top of engaged heads by Scc2 and entrapment within the ring by Scc3. *elife* **9**, e59560 (2020).
2. Lee, B.-G. et al. Cryo-EM structures of holo condensin reveal a subunit flip-flop mechanism. *Nat Struct Mol Biol* **27**, 743-751 (2020).
3. Burmann, F., Funke, L. F. H., Chin, J. W. & Lowe, J. Cryo-EM structure of MukBEF reveals DNA loop entrapment at chromosomal unloading sites. *Mol Cell* **81**, 4891-4906 (2021).

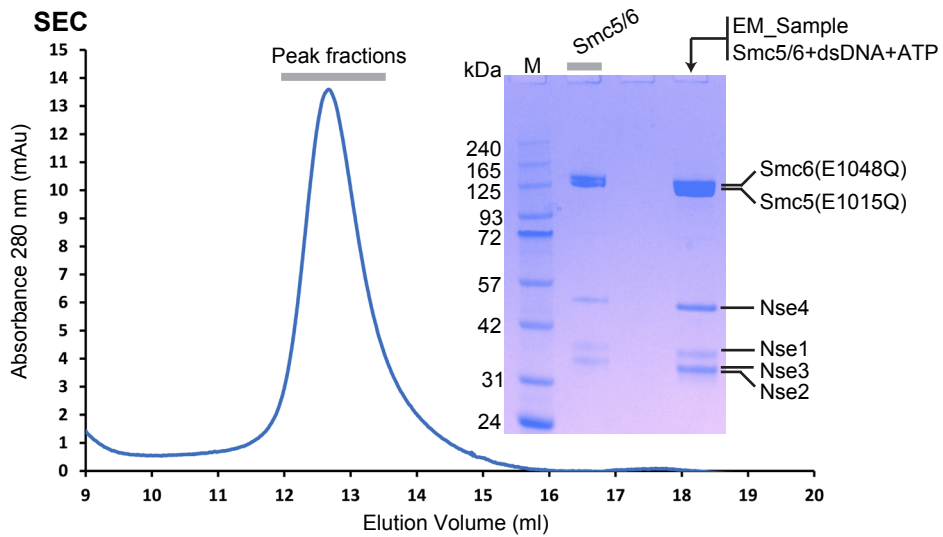

**Figure S1**

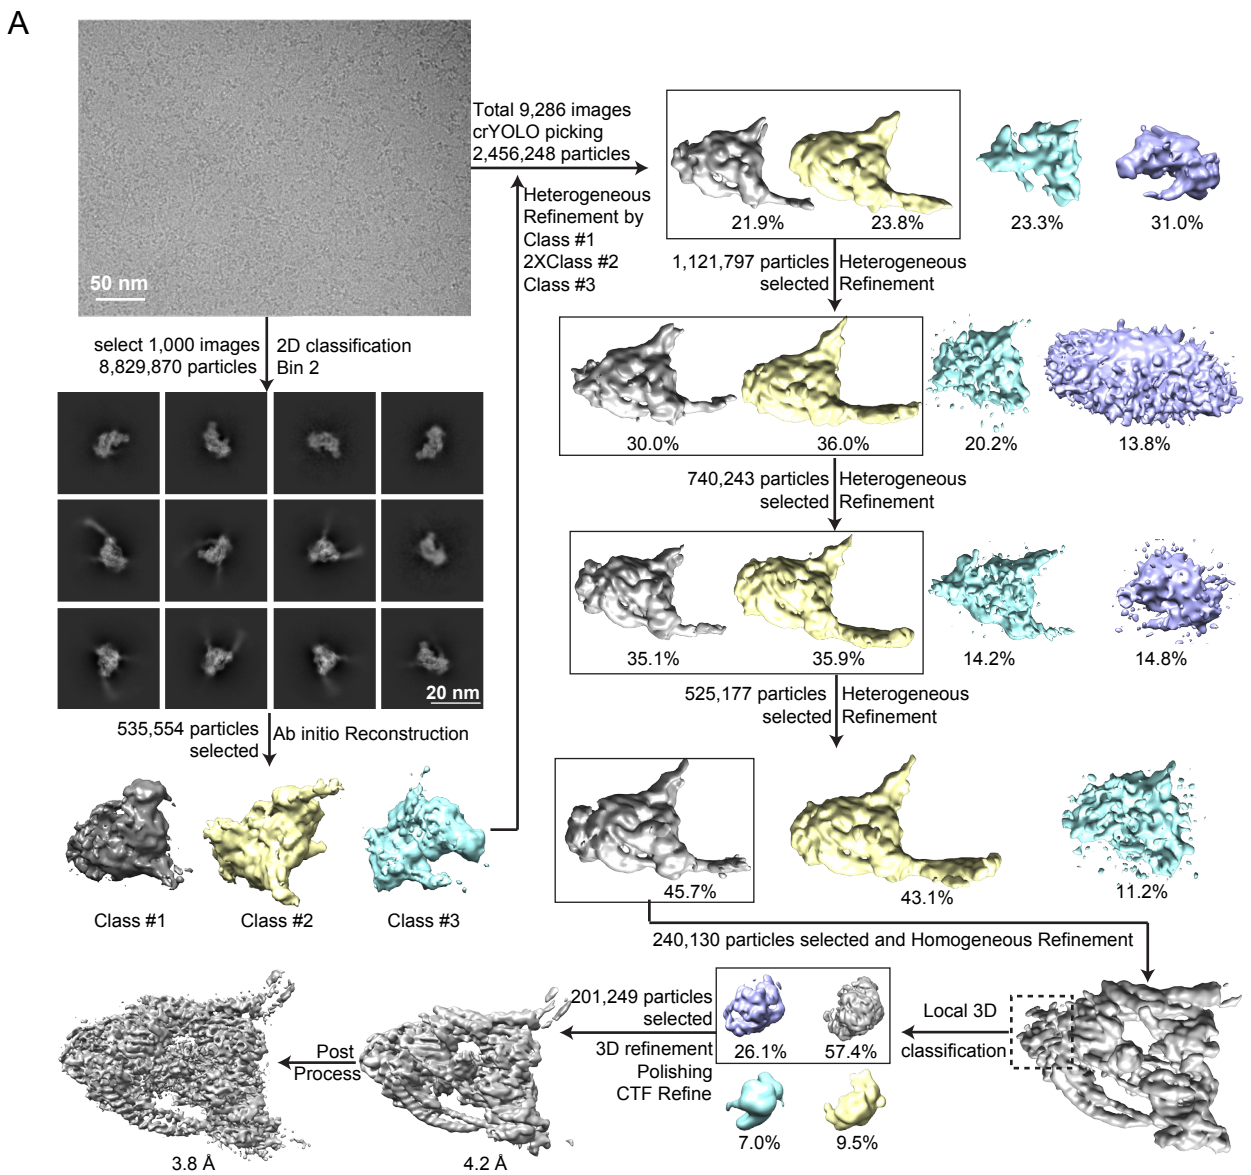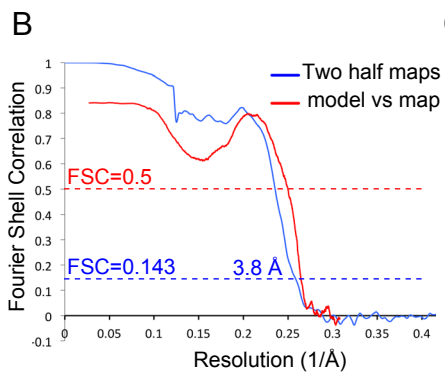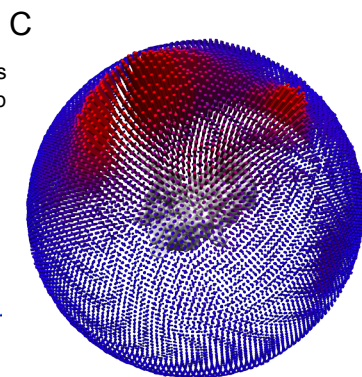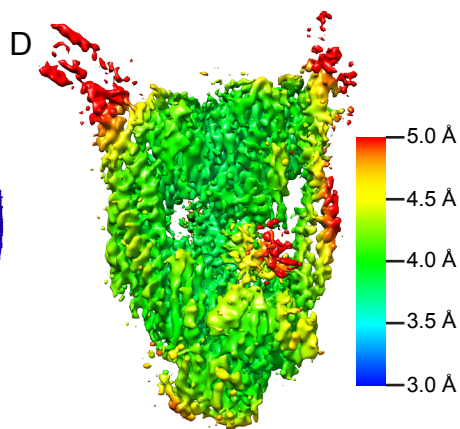

**Figure S2**

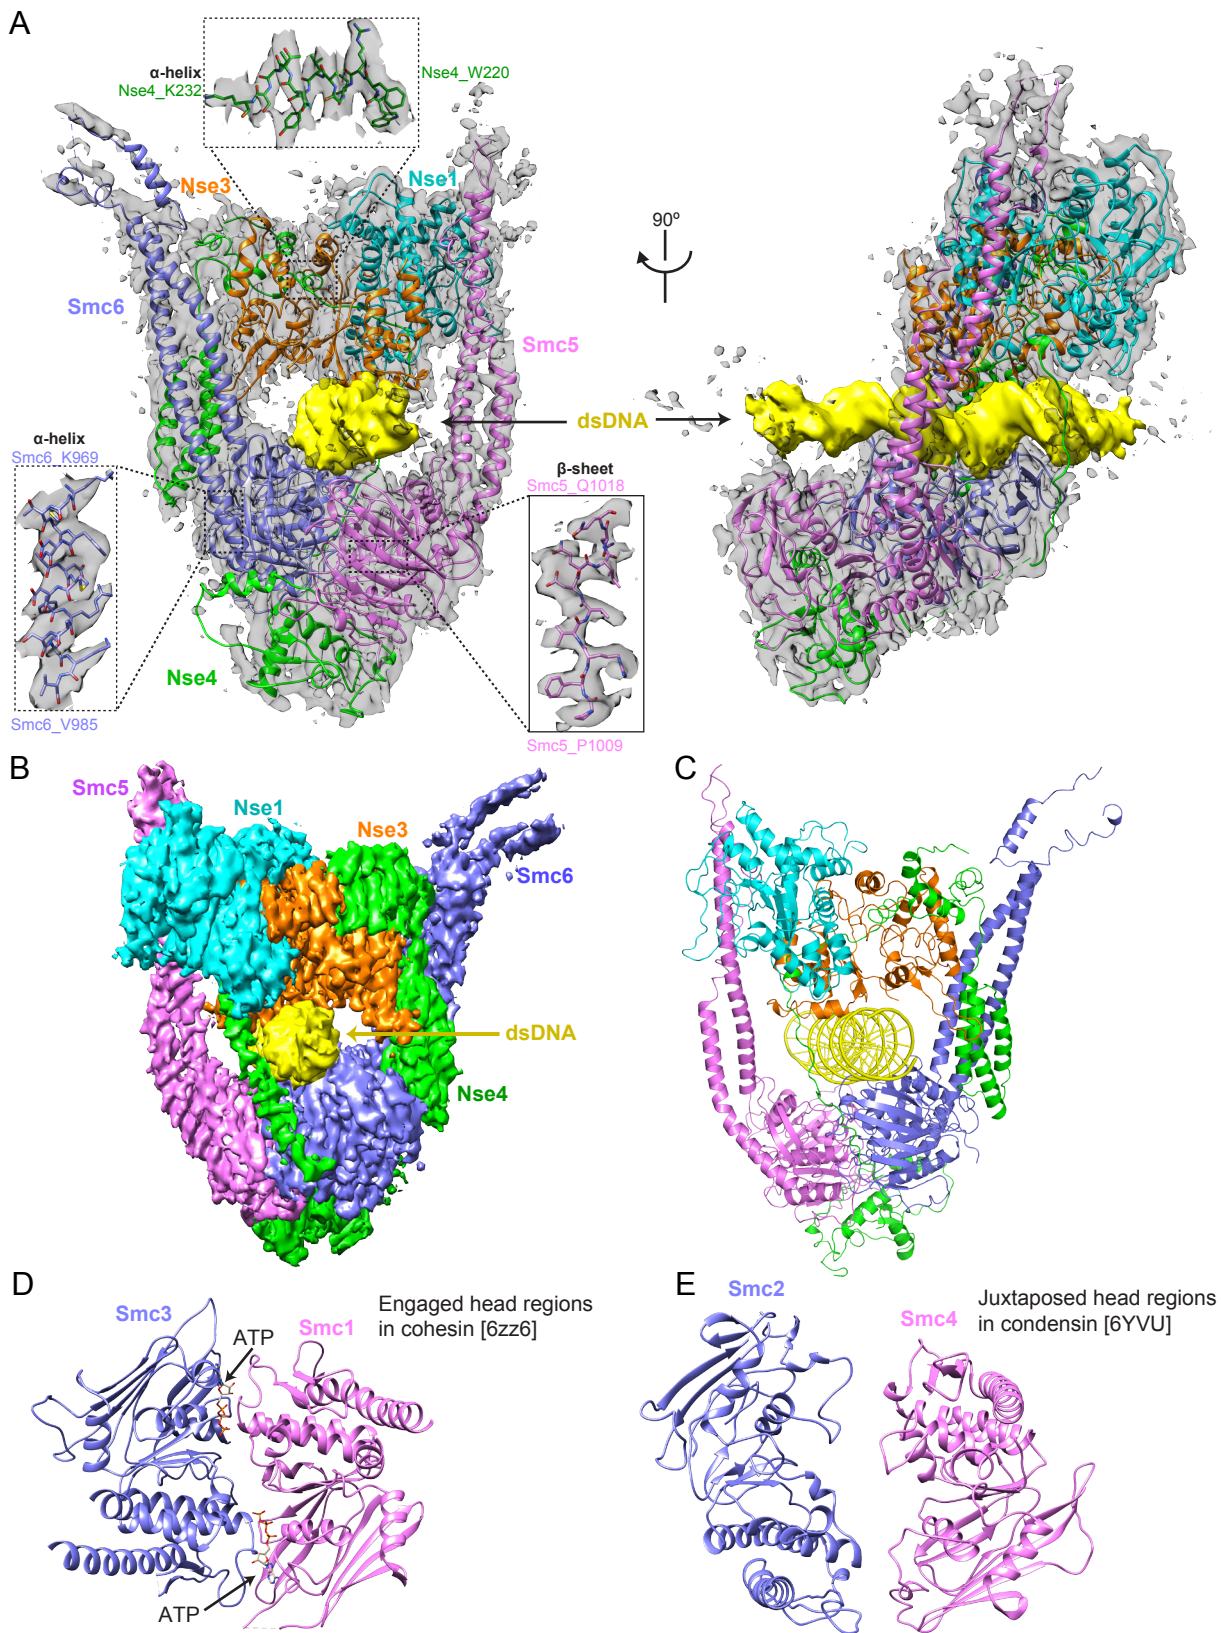

**Figure S3**

A

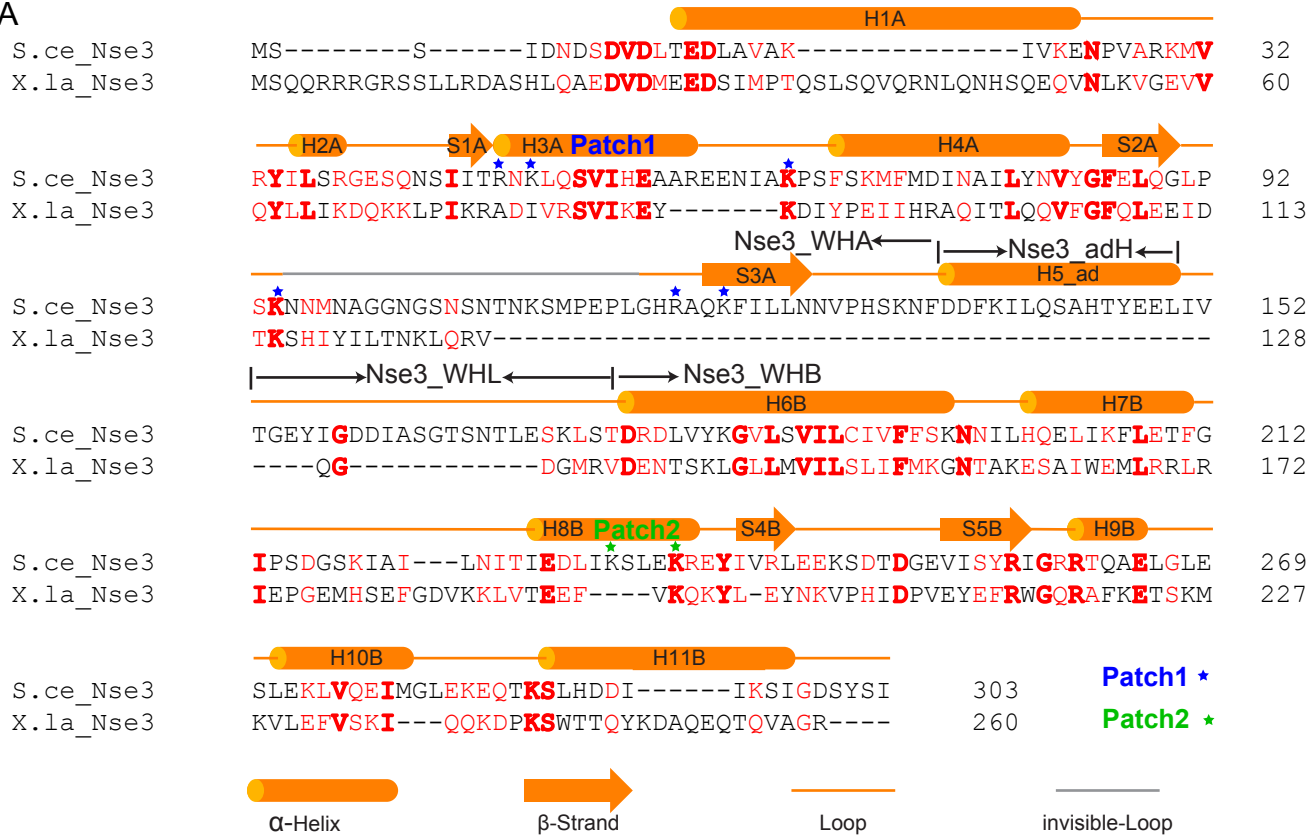

B

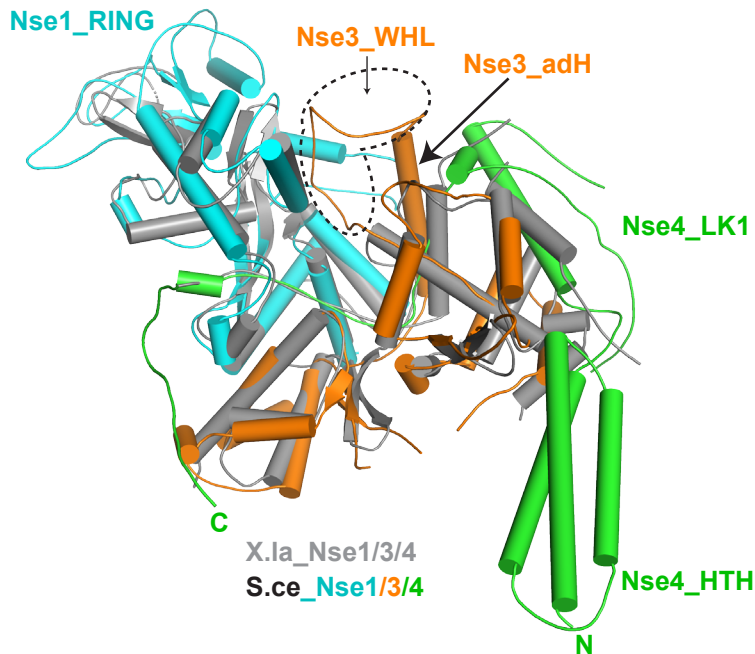

Figure S4



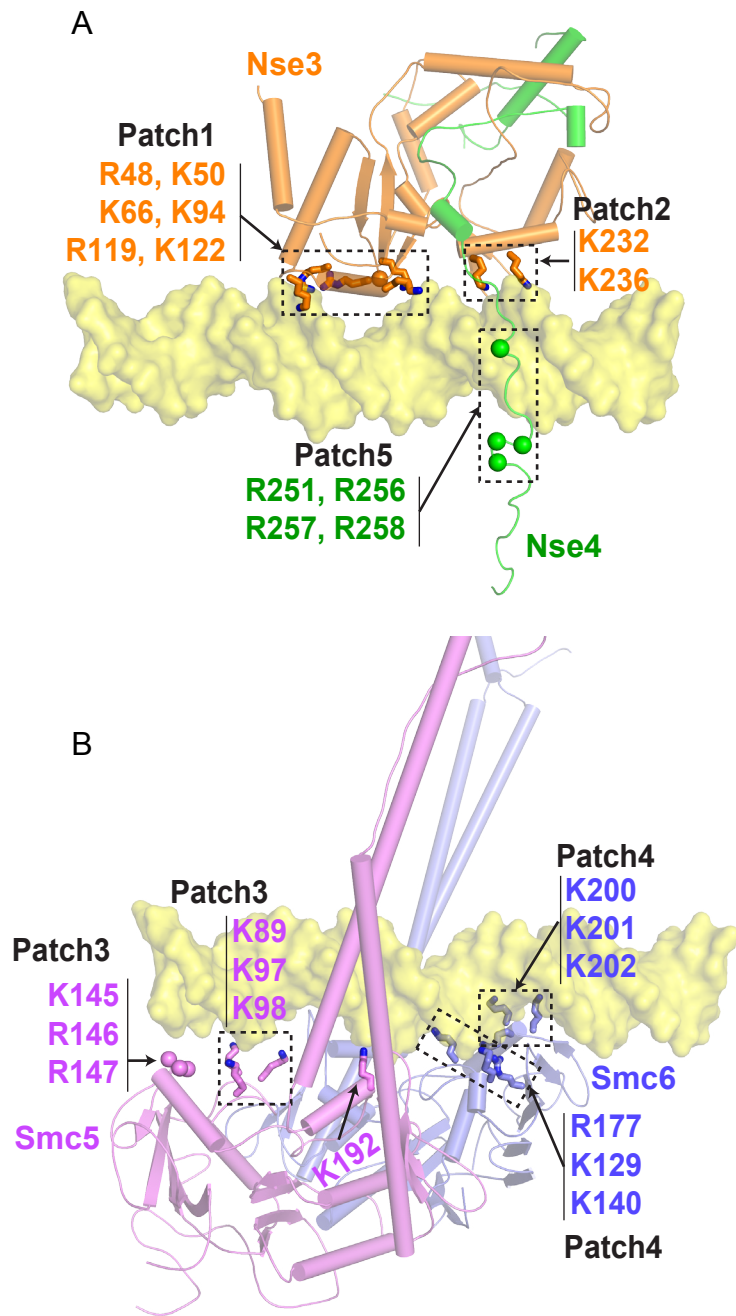

**Figure S5**

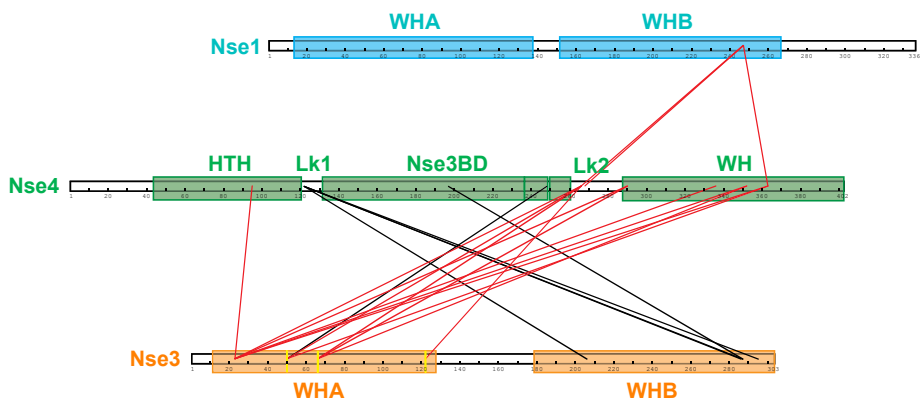

**Figure S6**

**A**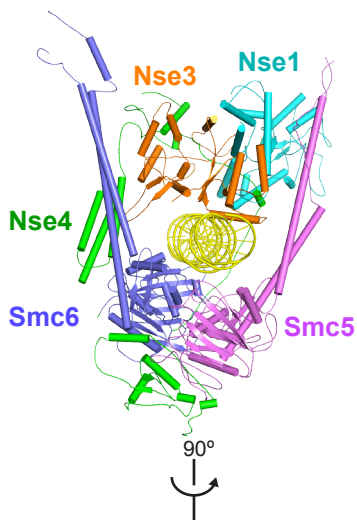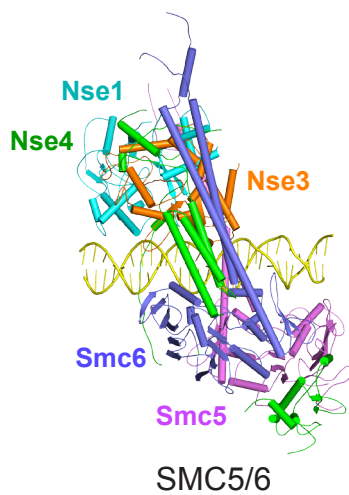**B**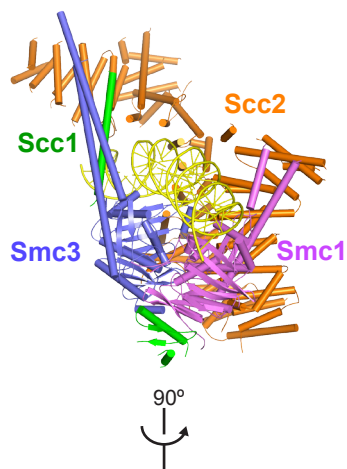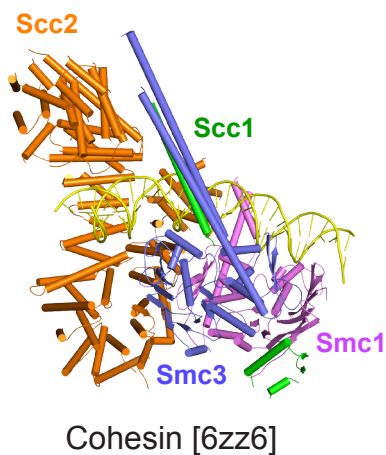**C**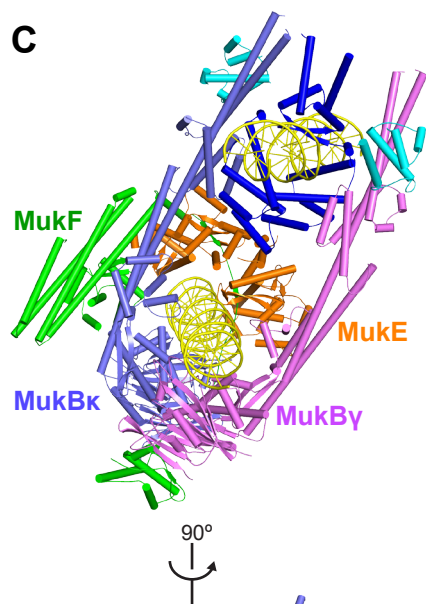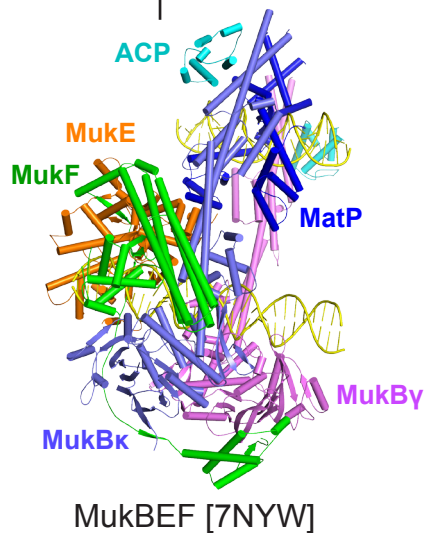**Figure S7**

**Table S1. Cryo-EM data collection, processing, and validation statistics**

|                                                             |                                            |
|-------------------------------------------------------------|--------------------------------------------|
| <i>Sample</i>                                               | ATP-dsDNA-SMC5/6<br>EMD-26140<br>PDB: 7TVE |
| <b>Data collection</b>                                      |                                            |
| <i>Microscope</i>                                           | Titan Krios                                |
| <i>Detector</i>                                             | Gatan K3                                   |
| <i>Automation software</i>                                  | Leginon                                    |
| <i>Nominal magnification</i>                                | 81,000                                     |
| <i>Voltage (kV)</i>                                         | 300 kV                                     |
| <i>Total dose (<math>\bar{e}/\text{\AA}^2</math>)</i>       | 53.55                                      |
| <i>Dose rate (<math>\bar{e}/\text{pixel/s}</math>)</i>      | 30                                         |
| <i>Number of frames collected</i>                           | 40                                         |
| <i>Defocus range (<math>\mu\text{m}</math>)</i>             | -0.8 to -2.5                               |
| <i>Pixel size (<math>\text{\AA}</math>)</i>                 | 1.069                                      |
| <i>Collected Micrographs</i>                                | 9,286                                      |
| <i>Selected Micrographs</i>                                 | 9,286                                      |
| <b>Reconstruction</b>                                       |                                            |
| <i>Initially autopicked particles</i>                       | 2,456,248                                  |
| <i>Particles used for classification</i>                    | 2,456,248                                  |
| <i>Particles in the final map</i>                           | 201,249                                    |
| <i>Symmetry</i>                                             | C1                                         |
| <i>Resolution</i>                                           |                                            |
| <i>FSC 0.5 (unmasked/masked, <math>\text{\AA}</math>)</i>   | 4.1/4.1                                    |
| <i>FSC 0.143 (unmasked/masked, <math>\text{\AA}</math>)</i> | 3.8/3.8                                    |
| <i>Map sharpening B factor (<math>\text{\AA}^2</math>)</i>  | -138.59                                    |
| <b>Model composition</b>                                    |                                            |
| <i>Protein residues</i>                                     | 1793                                       |
| <i>Nonhydrogen atoms</i>                                    | 15466                                      |
| <b>Validation</b>                                           |                                            |
| <i>MolProbity</i>                                           | 2.78                                       |
| <i>Clash score</i>                                          | 17.8                                       |
| <i>Map Correlation Coefficient</i>                          | 0.69                                       |
| <i>R.m.s. deviations</i>                                    |                                            |
| <i>Bond lengths (<math>\text{\AA}</math>)</i>               | 0.005                                      |
| <i>Bond angles (<math>^\circ</math>)</i>                    | 0.827                                      |
| <i>Ramachandran plots</i>                                   |                                            |
| <i>Favored (%)</i>                                          | 86.28                                      |
| <i>Allowed (%)</i>                                          | 13.44                                      |
| <i>Outliers (%)</i>                                         | 0.28                                       |
| <i>Rotamer outliers (%)</i>                                 | 3.26                                       |

**Table S2 CLMS analyses results used in this study**

| Protein 1 | Residue 1 | Protein 2 | Residue 2 | CA distance | Threshold | Sat-Viol | inter vs intra | figure panel | dataset             |
|-----------|-----------|-----------|-----------|-------------|-----------|----------|----------------|--------------|---------------------|
| SMC5      | 248       | SMC6      | 916       | 78.7        | 30        | V        | inter          | Figure 6A    | Yu et al 2021       |
| SMC5      | 260       | SMC6      | 906       | 85.6        | 30        | V        | inter          | Figure 6A    | Yu et al 2021       |
| SMC5      | 248       | SMC6      | 913       | 81.5        | 30        | V        | inter          | Figure 6A    | Yu et al 2021       |
| SMC5      | 260       | SMC6      | 913       | 78.6        | 30        | V        | inter          | Figure 6A    | Yu et al 2021       |
| SMC5      | 259       | SMC6      | 913       | 78.8        | 30        | V        | inter          | Figure 6A    | Yu et al 2021       |
| SMC5      | 259       | SMC6      | 906       | 86          | 30        | V        | inter          | Figure 6A    | Yu et al 2021       |
| SMC5      | 259       | SMC6      | 917       | 75.9        | 30        | V        | inter          | Figure 6A    | Yu et al 2021       |
| SMC5      | 248       | SMC6      | 917       | 77.5        | 30        | V        | inter          | Figure 6A    | Yu et al 2021       |
| SMC5      | 252       | SMC6      | 913       | 79          | 30        | V        | inter          | Figure 6A    | Yu et al 2021       |
| SMC5      | 259       | SMC6      | 913       | 78.8        | 25        | V        | inter          | Figure 6A    | Taschner et al 2021 |
| SMC5      | 248       | SMC6      | 913       | 81.5        | 25        | V        | inter          | Figure 6A    | Taschner et al 2021 |
| SMC5      | 248       | SMC6      | 921       | 82.9        | 25        | V        | inter          | Figure 6A    | Taschner et al 2021 |
| SMC5      | 252       | SMC6      | 913       | 79          | 25        | V        | inter          | Figure 6A    | Taschner et al 2021 |
| SMC5      | 249       | SMC6      | 913       | 79          | 25        | V        | inter          | Figure 6A    | Taschner et al 2021 |
| NSE3      | 246       | SMC5      | 909       | 73          | 30        | V        | inter          | Figure 6B    | Yu et al 2021       |
| NSE3      | 236       | SMC5      | 919       | 57.2        | 25        | V        | inter          | Figure 6B    | Taschner et al 2021 |
| NSE3      | 236       | SMC5      | 980       | 46.7        | 25        | V        | inter          | Figure 6B    | Taschner et al 2021 |
| NSE3      | 236       | SMC5      | 979       | 47.4        | 25        | V        | inter          | Figure 6B    | Taschner et al 2021 |
| NSE3      | 246       | SMC5      | 919       | 70.6        | 25        | V        | inter          | Figure 6B    | Taschner et al 2021 |
| NSE3      | 23        | SMC5      | 980       | 48.9        | 25        | V        | inter          | Figure 6B    | Taschner et al 2021 |
| NSE3      | 66        | SMC5      | 980       | 35.8        | 25        | V        | inter          | Figure 6B    | Taschner et al 2021 |
| NSE3      | 23        | SMC6      | 281       | 65.7        | 25        | V        | inter          | Figure 6B    | Taschner et al 2021 |
| NSE4      | 197       | SMC5      | 235       | 72.4        | 25        | V        | inter          | Figure 6B    | Taschner et al 2021 |
| NSE4      | 197       | SMC6      | 281       | 13.8        | 25        | S        | inter          | Figure 6B    | Taschner et al 2021 |
| NSE1      | 247       | NSE4      | 266       | 71          | 30        | V        | inter          | Figure 6C    | Yu et al 2021       |
| NSE1      | 247       | NSE4      | 268       | 75.3        | 30        | V        | inter          | Figure 6C    | Yu et al 2021       |
| NSE1      | 247       | NSE4      | 363       | 113.8       | 30        | V        | inter          | Figure 6C    | Yu et al 2021       |
| NSE3      | 23        | NSE4      | 363       | 85.3        | 30        | V        | inter          | Figure 6C    | Yu et al 2021       |
| NSE3      | 206       | NSE4      | 122       | 19.2        | 30        | S        | inter          | Figure 6C    | Yu et al 2021       |
| NSE3      | 295       | NSE4      | 122       | 10.3        | 30        | S        | inter          | Figure 6C    | Yu et al 2021       |
| NSE3      | 23        | NSE4      | 95        | 70          | 25        | V        | inter          | Figure 6C    | Taschner et al 2021 |
| NSE3      | 23        | NSE4      | 266       | 68.4        | 25        | V        | inter          | Figure 6C    | Taschner et al 2021 |
| NSE3      | 23        | NSE4      | 336       | 84.5        | 25        | V        | inter          | Figure 6C    | Taschner et al 2021 |
| NSE3      | 23        | NSE4      | 352       | 89          | 25        | V        | inter          | Figure 6C    | Taschner et al 2021 |
| NSE3      | 50        | NSE4      | 266       | 47          | 25        | V        | inter          | Figure 6C    | Taschner et al 2021 |
| NSE3      | 50        | NSE4      | 363       | 72.3        | 25        | V        | inter          | Figure 6C    | Taschner et al 2021 |
| NSE3      | 66        | NSE4      | 266       | 56.1        | 25        | V        | inter          | Figure 6C    | Taschner et al 2021 |
| NSE3      | 66        | NSE4      | 290       | 71.1        | 25        | V        | inter          | Figure 6C    | Taschner et al 2021 |
| NSE3      | 66        | NSE4      | 352       | 75.6        | 25        | V        | inter          | Figure 6C    | Taschner et al 2021 |
| NSE3      | 122       | NSE4      | 266       | 51.7        | 25        | V        | inter          | Figure 6C    | Taschner et al 2021 |
| NSE3      | 50        | NSE4      | 248       | 24.1        | 25        | S        | inter          | Figure 6C    | Taschner et al 2021 |
| NSE3      | 286       | NSE4      | 122       | 22.7        | 25        | S        | inter          | Figure 6C    | Taschner et al 2021 |
| NSE3      | 287       | NSE4      | 122       | 23          | 25        | S        | inter          | Figure 6C    | Taschner et al 2021 |
| NSE3      | 287       | NSE4      | 197       | 15.2        | 25        | S        | inter          | Figure 6C    | Taschner et al 2021 |
| NSE4      | 95        | NSE4      | 122       | 43.3        | 25        | V        | intra          | Figure 6D    | Taschner et al 2021 |
| NSE4      | 248       | NSE4      | 266       | 47.2        | 25        | V        | intra          | Figure 6D    | Taschner et al 2021 |
| NSE4      | 266       | NSE4      | 285       | 40.6        | 25        | V        | intra          | Figure 6D    | Taschner et al 2021 |
| NSE4      | 266       | NSE4      | 290       | 49.1        | 25        | V        | intra          | Figure 6D    | Taschner et al 2021 |
| NSE4      | 266       | NSE4      | 352       | 62.6        | 25        | V        | intra          | Figure 6D    | Taschner et al 2021 |
| NSE4      | 266       | NSE4      | 363       | 65.2        | 25        | V        | intra          | Figure 6D    | Taschner et al 2021 |
| NSE4      | 268       | NSE4      | 333       | 48.9        | 25        | V        | intra          | Figure 6D    | Taschner et al 2021 |
| NSE4      | 268       | NSE4      | 363       | 60.3        | 25        | V        | intra          | Figure 6D    | Taschner et al 2021 |
| SMC5      | 235       | SMC5      | 915       | 28.3        | 30        | S        | intra          | Figure 6E    | Yu et al 2021       |
| SMC5      | 235       | SMC5      | 909       | 22.9        | 30        | S        | intra          | Figure 6E    | Yu et al 2021       |
| SMC5      | 248       | SMC5      | 260       | 18.5        | 30        | S        | intra          | Figure 6E    | Yu et al 2021       |
| SMC5      | 248       | SMC5      | 259       | 16.7        | 30        | S        | intra          | Figure 6E    | Yu et al 2021       |
| SMC5      | 227       | SMC5      | 235       | 12.7        | 30        | S        | intra          | Figure 6E    | Yu et al 2021       |
| SMC5      | 252       | SMC5      | 260       | 12.5        | 30        | S        | intra          | Figure 6E    | Yu et al 2021       |

|      |      |      |      |      |    |   |       |           |                     |
|------|------|------|------|------|----|---|-------|-----------|---------------------|
| SMC5 | 111  | SMC5 | 136  | 12.4 | 30 | S | intra | Figure 6E | Yu et al 2021       |
| SMC5 | 192  | SMC5 | 980  | 11.7 | 30 | S | intra | Figure 6E | Yu et al 2021       |
| SMC5 | 252  | SMC5 | 259  | 10.6 | 30 | S | intra | Figure 6E | Yu et al 2021       |
| SMC5 | 44   | SMC5 | 136  | 10.2 | 30 | S | intra | Figure 6E | Yu et al 2021       |
| SMC5 | 971  | SMC5 | 980  | 9.1  | 30 | S | intra | Figure 6E | Yu et al 2021       |
| SMC5 | 971  | SMC5 | 979  | 6.7  | 30 | S | intra | Figure 6E | Yu et al 2021       |
| SMC5 | 245  | SMC5 | 249  | 6.2  | 30 | S | intra | Figure 6E | Yu et al 2021       |
| SMC5 | 915  | SMC5 | 919  | 6.1  | 30 | S | intra | Figure 6E | Yu et al 2021       |
| SMC5 | 245  | SMC5 | 248  | 4.9  | 30 | S | intra | Figure 6E | Yu et al 2021       |
| SMC5 | 232  | SMC5 | 235  | 4.7  | 30 | S | intra | Figure 6E | Yu et al 2021       |
| SMC6 | 288  | SMC6 | 304  | 24.9 | 30 | S | intra | Figure 6E | Yu et al 2021       |
| SMC6 | 987  | SMC6 | 1070 | 22.6 | 30 | S | intra | Figure 6E | Yu et al 2021       |
| SMC6 | 943  | SMC6 | 958  | 22.6 | 30 | S | intra | Figure 6E | Yu et al 2021       |
| SMC6 | 989  | SMC6 | 1059 | 18.8 | 30 | S | intra | Figure 6E | Yu et al 2021       |
| SMC6 | 987  | SMC6 | 1067 | 18.1 | 30 | S | intra | Figure 6E | Yu et al 2021       |
| SMC6 | 1067 | SMC6 | 1087 | 17.3 | 30 | S | intra | Figure 6E | Yu et al 2021       |
| SMC6 | 1059 | SMC6 | 1070 | 17.1 | 30 | S | intra | Figure 6E | Yu et al 2021       |
| SMC6 | 987  | SMC6 | 1059 | 15.3 | 30 | S | intra | Figure 6E | Yu et al 2021       |
| SMC6 | 1059 | SMC6 | 1087 | 13.7 | 30 | S | intra | Figure 6E | Yu et al 2021       |
| SMC6 | 83   | SMC6 | 160  | 13.4 | 30 | S | intra | Figure 6E | Yu et al 2021       |
| SMC6 | 1059 | SMC6 | 1081 | 12.4 | 30 | S | intra | Figure 6E | Yu et al 2021       |
| SMC6 | 965  | SMC6 | 996  | 12   | 30 | S | intra | Figure 6E | Yu et al 2021       |
| SMC6 | 1070 | SMC6 | 1077 | 11.5 | 30 | S | intra | Figure 6E | Yu et al 2021       |
| SMC6 | 901  | SMC6 | 906  | 11.2 | 30 | S | intra | Figure 6E | Yu et al 2021       |
| SMC6 | 958  | SMC6 | 965  | 10.8 | 30 | S | intra | Figure 6E | Yu et al 2021       |
| SMC6 | 906  | SMC6 | 913  | 10.7 | 30 | S | intra | Figure 6E | Yu et al 2021       |
| SMC6 | 1067 | SMC6 | 1070 | 5.3  | 30 | S | intra | Figure 6E | Yu et al 2021       |
| NSE1 | 97   | NSE1 | 247  | 18.2 | 30 | S | intra | Figure 6F | Yu et al 2021       |
| NSE1 | 99   | NSE1 | 243  | 19.1 | 30 | S | intra | Figure 6F | Yu et al 2021       |
| NSE3 | 23   | NSE3 | 66   | 14.2 | 25 | S | intra | Figure 6F | Taschner et al 2021 |
| NSE3 | 50   | NSE3 | 66   | 15.8 | 25 | S | intra | Figure 6F | Taschner et al 2021 |
| NSE3 | 50   | NSE3 | 122  | 9.5  | 25 | S | intra | Figure 6F | Taschner et al 2021 |
| NSE3 | 50   | NSE3 | 236  | 17.1 | 25 | S | intra | Figure 6F | Taschner et al 2021 |
| NSE3 | 53   | NSE3 | 66   | 12.6 | 25 | S | intra | Figure 6F | Taschner et al 2021 |
| NSE3 | 66   | NSE3 | 122  | 20.7 | 25 | S | intra | Figure 6F | Taschner et al 2021 |
| NSE3 | 122  | NSE3 | 236  | 14.2 | 25 | S | intra | Figure 6F | Taschner et al 2021 |
| NSE3 | 133  | NSE3 | 283  | 13.6 | 25 | S | intra | Figure 6F | Taschner et al 2021 |
